# Supplementary material for: Biohybrid architectures for efficient light-to-current conversion based on photosystem I within scalable 3D mesoporous electrodes
Source: Royal Society of Chemistry journal article supplement (doi:10.1039/c6ta07141d), 2016-01-01
Supplement: c6ta07141d1.pdf [file c6ta07141d1.pdf]

## Biohybrid architectures for efficient light-to-current conversion based on photosystem I within scalable 3D mesoporous electrodes

K. R. Stieger<sup>\*a</sup>, S. C. Feifel<sup>a</sup>, H. Lokstein<sup>b</sup>, M. Hejazi<sup>c</sup>, A. Zouni<sup>c</sup> and F. Lisdat<sup>\*a</sup>

### A) Calculation of the electro-active surface of a $\mu$ ITO structure

The electroactive surface of  $\mu$ ITO structure was calculated as follows: First cyclic voltammetry measurements of a defined surface area (geometrical surface:  $0.2 \text{ cm}^2$ ) of flat ITO (pre-cleaned by ultrasonication in acetone, isopropanol and water) and of 2, 4, 6, 8 x  $\mu$ ITO (geometrical surface:  $0.2 \text{ cm}^2$ ) have been performed from  $-300 - +400 \text{ mV}$  vs. Ag/AgCl at RT in phosphate buffer (5 mM, pH 7) without any redox species. At  $0 \text{ mV}$  vs. Ag/AgCl ( $dl/dV = 0$ ) the charging currents (anodic and cathodic) have been determined and averaged ( $n = 4$ ). Here, we assume that the electroactive surface of flat ITO is corresponding to its geometrical surface and that the electrochemical double layer structure is similar for ITO and  $\mu$ ITO. This means higher charging currents are only caused by a higher surface area in contact with the electrolyte. Consequently, the electroactive surface area is calculated for the  $\mu$ ITO out of the charging current increase of  $\mu$ ITO compared to flat ITO.

### I) Cyclic voltammetry of 6x $\mu$ ITO, 6x $\mu$ ITO-cyt c, 6x $\mu$ ITO-PSI-cyt c and $\mu$ ITO-PSI electrodes

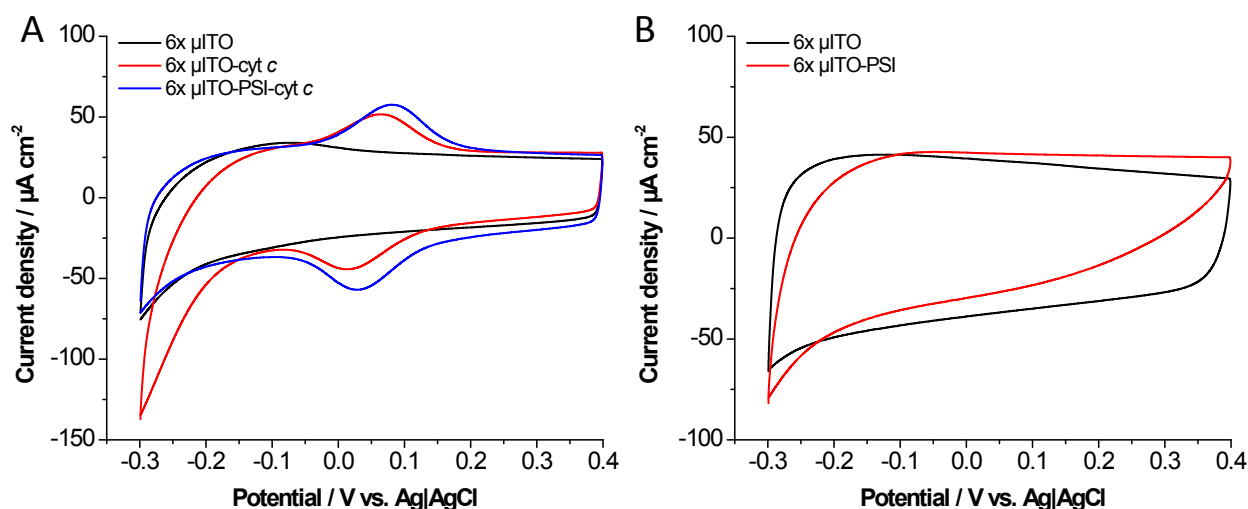

**Figure S1.** Cyclic voltammograms of different 6x  $\mu$ ITO electrodes: **A)** CV of a bare 6x $\mu$ ITO, a 6x  $\mu$ ITO-cyt c and a 6x  $\mu$ ITO-PSI-cyt c electrode. **B)** CV of a bare 6x $\mu$ ITO and a 6x $\mu$ ITO/PSI electrode. No redox signals can be detected when only PSI is immobilized in the structure. The experiments have been performed in the dark at a scan rate of  $10 \text{ mV s}^{-1}$  in aerobic phosphate buffer (5 mM, pH 7).

## II) Photocatalysis of 6x $\mu$ ITO-PSI-cyt *c* electrodes

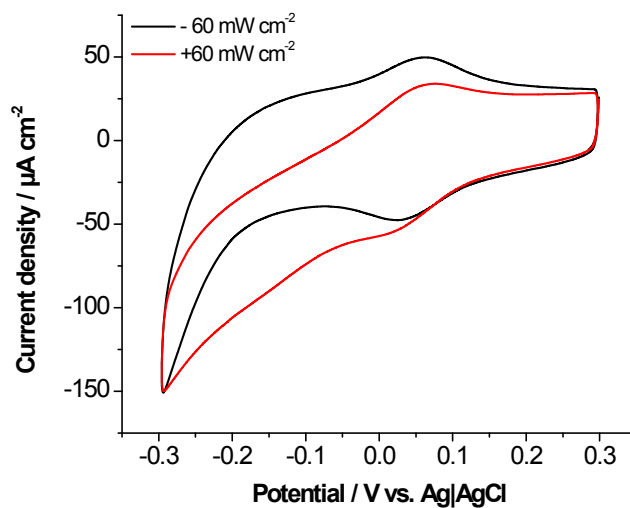

**Figure S2.** Photo-induced catalytic current of the 6x  $\mu$ ITO-PSI-cyt *c* electrode. The experiment has been performed in the dark (black) and with 60 mW cm<sup>-2</sup> of white light (red) at a scan rate of 10 mV s<sup>-1</sup> in aerobic phosphate buffer (5 mM, pH 7) as well as 1 mM methyl viologen. In the dark only the redox conversion of cyt *c* can be seen at around 45 mV vs. Ag/AgCl. Cathodic catalysis under illumination starts at a potential at which cyt *c* can be reduced by the electrode. This means that first electrons are transferred from the  $\mu$ ITO to cyt *c* before PSI reduction by cyt *c* occurs.

## III) Photocurrent control: $\mu$ ITO-PSI, $\mu$ ITO-cyt *c*, $\mu$ ITO

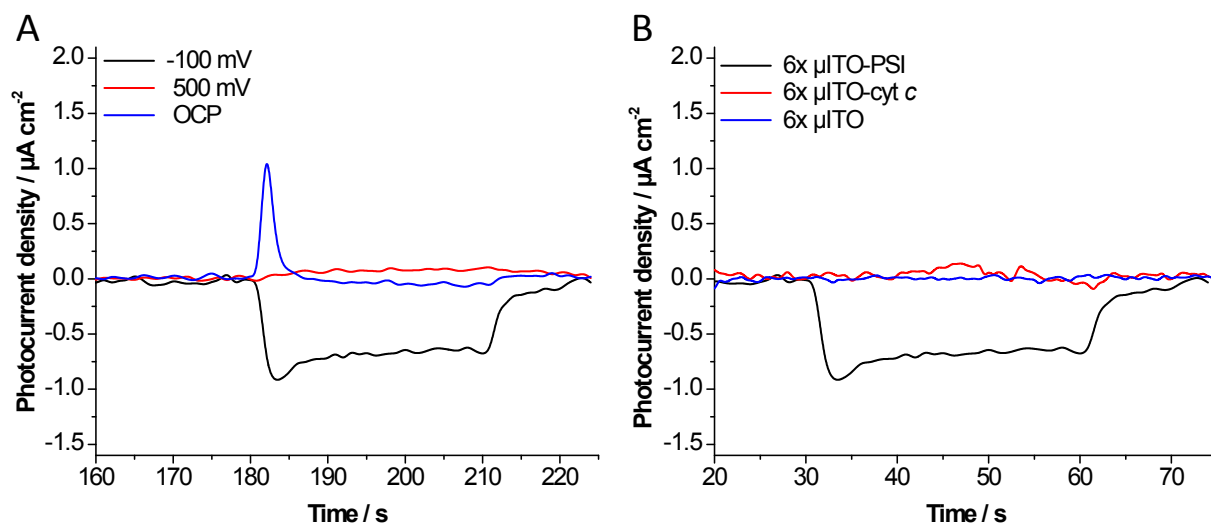

**Figure S3.** Photocurrent measurements of the 6x  $\mu$ ITO-PSI, 6x  $\mu$ ITO-cyt *c* and 6x  $\mu$ ITO electrodes. **(A)** The photocurrent measurements at three different potentials of a 6x  $\mu$ ITO-PSI (-100 mV, +500 mV, OCP = 196 mV vs. Ag/AgCl) exhibit only minor photocurrent densities, cathodic but no anodic photocurrents are observed (left). This experiment shows, that cyt *c* is necessary for the high unidirectional photocurrent generation. The direct electron transfer from PSI to the  $\mu$ ITO electrode is highly limited. **(B)** Comparison of photocurrents achieved at a potential of -100 mV vs. Ag/AgCl between 6x  $\mu$ ITO-PSI, 6x  $\mu$ ITO-cyt *c* and 6x  $\mu$ ITO electrodes. Without PSI in the structure there is no photocurrent detected. All experiments have been performed at RT in phosphate buffer (5 mM, pH 7) using white light (20 mW cm<sup>-2</sup>, 30 s pulse).

#### IV) Photocurrent of 6x $\mu$ ITO-PSI-cyt *c* electrodes in buffer of higher ionic strength

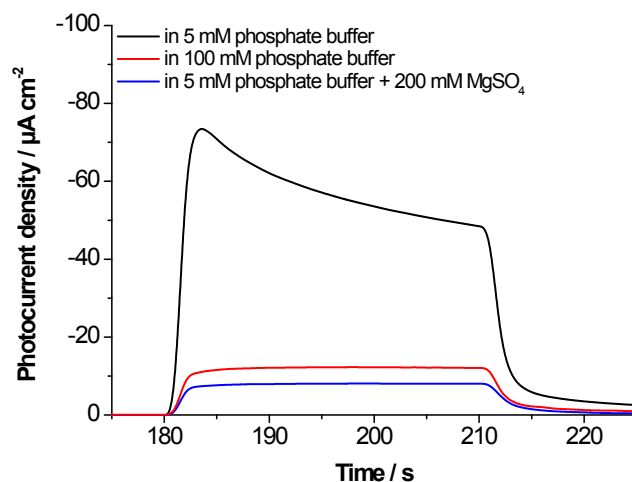

**Figure S4.** Photocurrent measurements of the 6x  $\mu$ ITO-PSI-cyt *c* electrode. Due to higher concentration of either buffer substance (100 mM phosphate) or addition of 200 mM  $\text{MgSO}_4$ , photocurrents decrease significantly. The experiments have been performed at RT in phosphate buffer (5 mM, pH 7) using white light ( $20 \text{ mW cm}^{-2}$ , 30 s pulse) at a potential of -100 vs. Ag/AgCl.

#### V) Surface area of air-sintered/air plasma-treated $\mu$ ITO electrodes

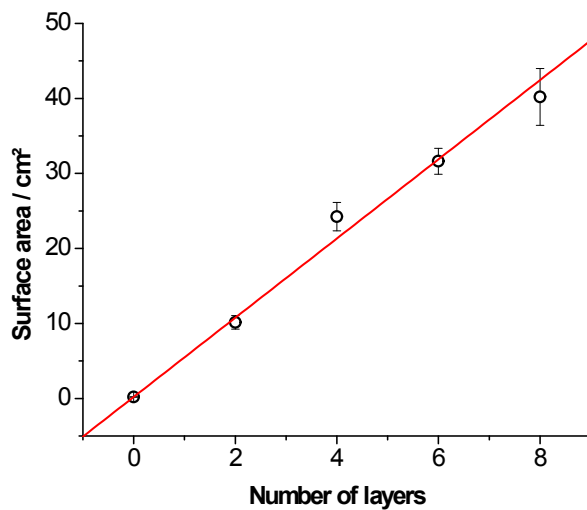

**Figure S5.** Surface area increase dependent on the number of applied layers for an air sintered  $\mu$ ITO electrode. The surface increases by  $5.3 \pm 0.2 \text{ cm}^2 / \text{layer}$  ( $R^2 = 0.995$ ,  $n = 4$ ).

#### VI) Determination of the heterogeneous electron transfer rate constant ( $k_s$ ) for a $\mu$ ITO-cyt *c* electrode

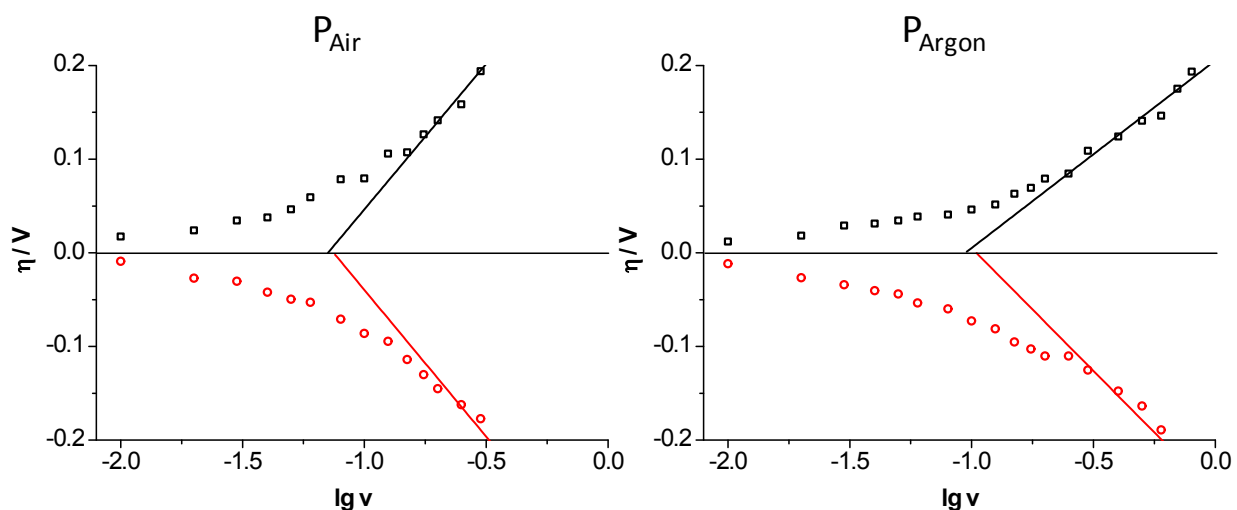

**Figure S6.** Trumpet plot for the determination of  $k_s$  after the method of Laviron for  $P_{Air}$  (left) and  $P_{Argon}$  (right). The overpotential ( $E_0 - E_p$ ) for both anodic (black) and cathodic (red) peaks is plotted against the decadic logarithm of the scan rate ( $\lg v$ ). A linear fit of the data with a peak separation of  $> 200$  mV results in a slope proportional to the charge transfer coefficient ( $\alpha$ ) with an intercept proportional to  $k_s$ .

## VII) Transmission spectra of ITO and 6x $\mu$ ITO structures

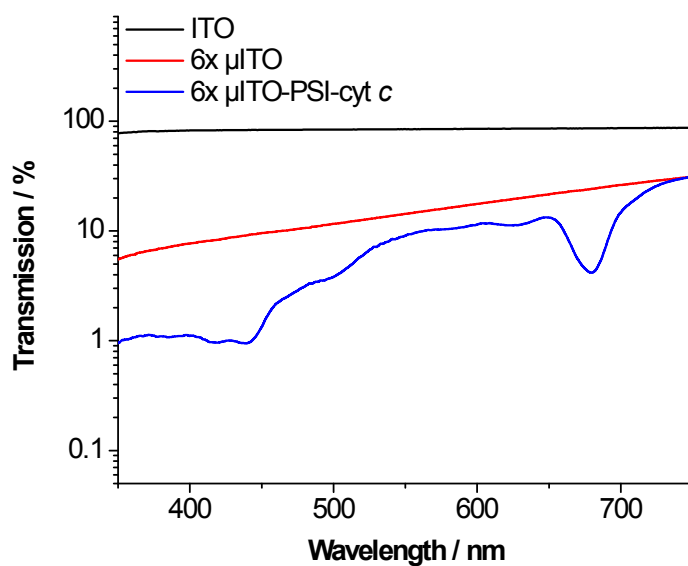

**Figure S7.** Transmission spectrum of ITO, 6x  $\mu$ ITO and 6x  $\mu$ ITO-PSI-cyt c electrodes.

## VII) Spectrum of the white light source

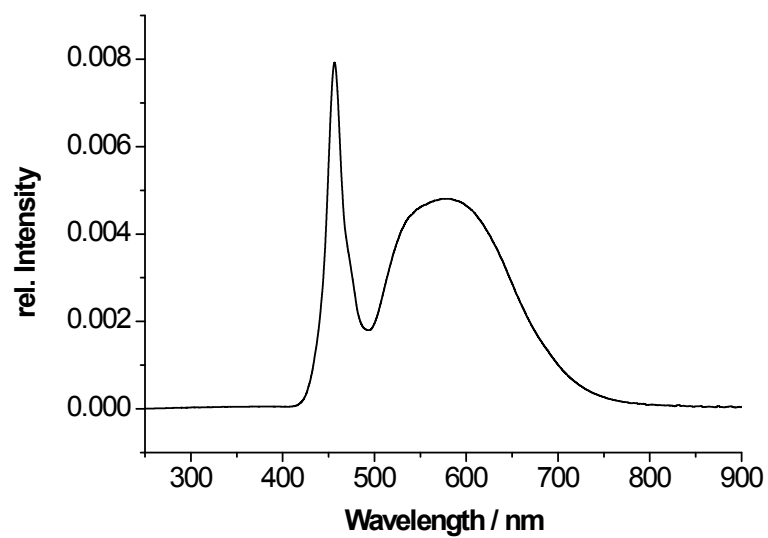

**Figure S8.** Spectrum of the white light source used in all experiments. The spectrum was normalized to an integral area of 1. Characteristic peaks are found at 456 nm and 576 nm.

---
